# Supplementary material for: Iron-Containing Oral Contraceptives and Their Effect on Hemoglobin and Biomarkers of Iron Status: A Narrative Review
Source: MDPI journal article supplement (doi:10.3390/nu13072340), 2021-07-09
Supplement: s1 [file s1]

**Table S1.** Search strategy of Ovid MEDLINE(R) and Epub Ahead of Print, In-Process & Other Non-Indexed Citations and Daily 1946 to May 10, 2021.

| # | Searches                                                                       | Results |
|---|--------------------------------------------------------------------------------|---------|
| 1 | Contraceptives, Oral/                                                          | 19341   |
| 2 | ((birth control or hormon* or<br>contracepti*) adj2 (pill* or<br>oral)).tw,kf. | 30423   |
| 3 | 1 or 2                                                                         | 36950   |
| 4 | Anemia, Iron-Deficiency/                                                       | 10437   |
| 5 | Iron Compounds/                                                                | 3193    |
| 6 | (iron or ferrous or ferritin or FE or<br>h?emoglobin or an?emia).tw,kf.        | 543362  |
| 7 | 4 or 5 or 6                                                                    | 544721  |
| 8 | 3 and 7                                                                        | 765     |
| 9 | limit 8 to (english language and<br>humans)                                    | 514     |
